# Supplementary material for: Structural basis of the histone ubiquitination read–write mechanism of RYBP–PRC1
Source: PubMed Central journal article supplement (PMC11257959; doi:10.1038/s41594-024-01258-x), 2024-03-25

Panel c:

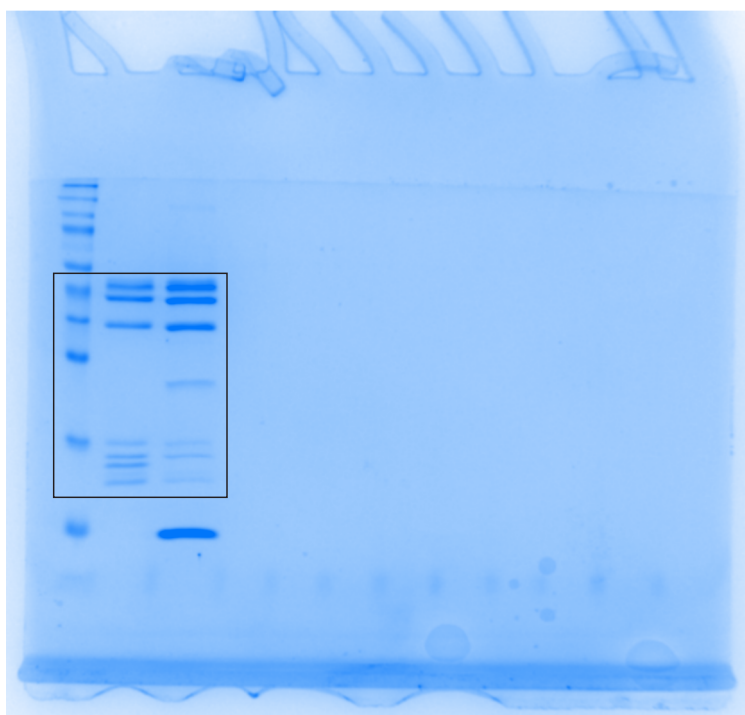

Supplement: 41594_2024_1258_MOESM3_ESM.pdf [file 41594_2024_1258_MOESM3_ESM.pdf]
